# Supplementary material for: An Optical Sensor with Polyaniline-Gold Hybrid Nanostructures for Monitoring pH in Saliva
Source: PubMed Central journal article supplement (PMC5388169; doi:10.3390/nano7030067), 2017-03-17
Supplement: nanomaterials-07-00067-s001.pdf [file nanomaterials-07-00067-s001.pdf]

# Supplementary Materials: An Optical Sensor with Polyaniline-Gold Hybrid Nanostructures for Monitoring pH in Saliva

Chongdai Luo, Yangyang Wang, Xuemeng Li, Xueqin Jiang, Panpan Gao, Kang Sun, Jianhua Zhou, Zhiguang Zhang and Qing Jiang

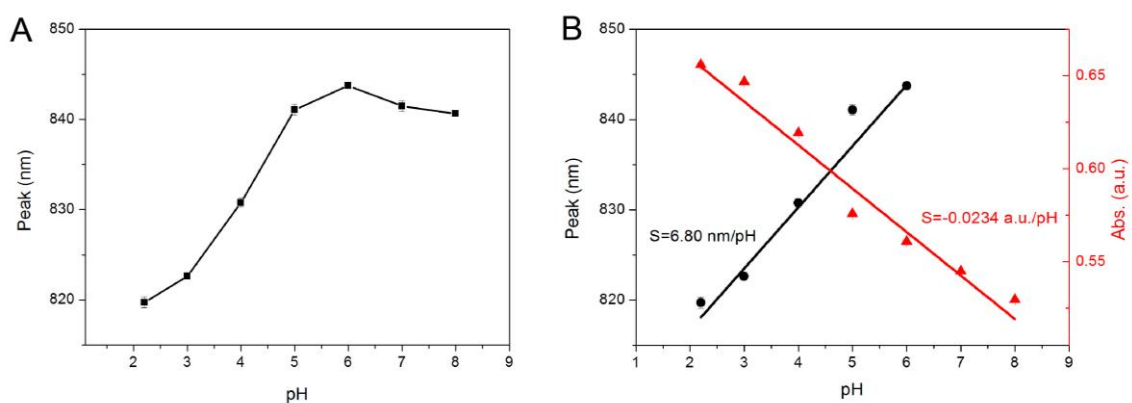

**Figure S1.** (A) The peak shift of PANI-GNPs-glass in different pH media; (B) two pH linear ranges of this PANI-GNPs-glass biosensor based on: the peak shift of PANI-GNPs-glass (black) and absorbance at 785 nm (red).

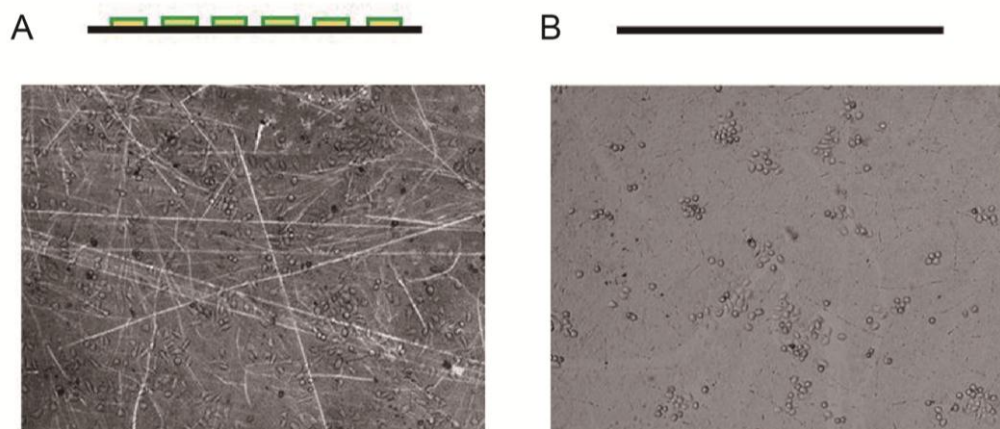

**Figure S2.** The viability of A549 cell on (A) GNPs-PANI-glass sensing substrate and (B) On glass.
